# Supplementary material for: Two Birds with One Stone: Ammonium-Induced Carbon Nanotube Structure and Low-Crystalline Cobalt Nanoparticles Enabling High Performance of Lithium-Sulfur Batteries
Source: MDPI journal article supplement (doi:10.3390/inorganics11070305), 2023-07-18
Supplement: s1 [file s1]

# Two Birds with One Stone: Ammonium-Induced Carbon Nanotube Structure and Low-Crystalline Cobalt Nanoparticles Enabling High Performance of Lithium-Sulfur Batteries

Qi Tan <sup>1</sup>, Hongliang Liu <sup>2</sup>, Guozhu Liang <sup>2</sup>, Kaigui Jiang <sup>2</sup>, Hangxuan Xie <sup>3</sup>, Weijie Si <sup>4</sup>, Jiajv Lin <sup>4,\*</sup> and Xiongwu Kang <sup>4,\*</sup>

<sup>1</sup> Guangdong Electric Power Development Co., Ltd., Guangzhou 510080, China

<sup>2</sup> Guangdong Zhuhai Jinwan Power Co., Ltd., Zhuhai 519000, China

<sup>3</sup> China Southern Power Grid Technology Co., Ltd., Guangzhou 510080, China

<sup>4</sup> New Energy Research Institute, School of Environment and Energy, South China University of Technology, Guangzhou 510006, China

\* Correspondence: linjiaju@dg.gd.csg.cn (J.L.); esxkang@scut.edu.cn (X.K.)

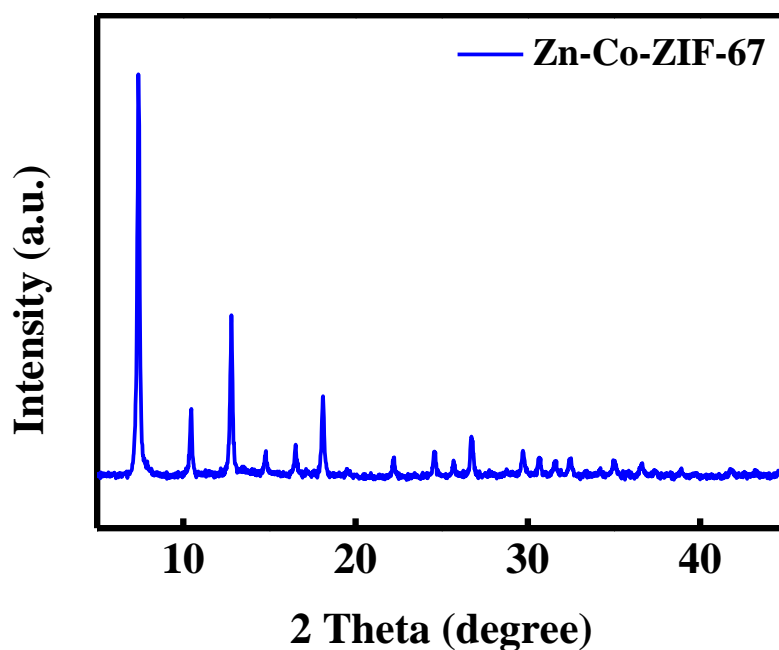

Fig.S1 The XRD pattern of Zn-Co-ZIF.

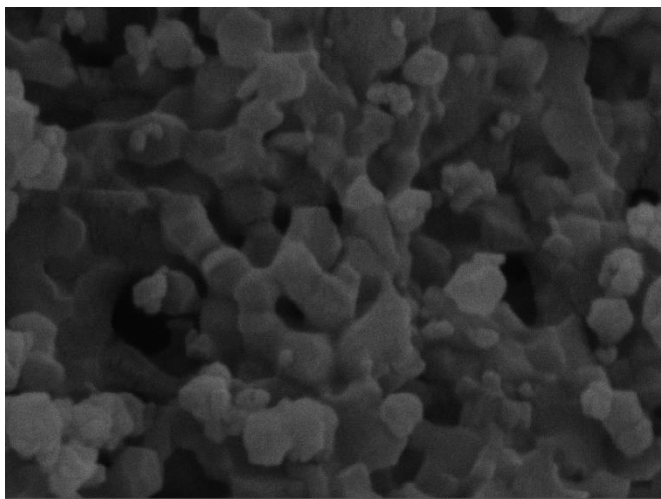

Fig.S2 SEM of Zn-Co-ZIF.

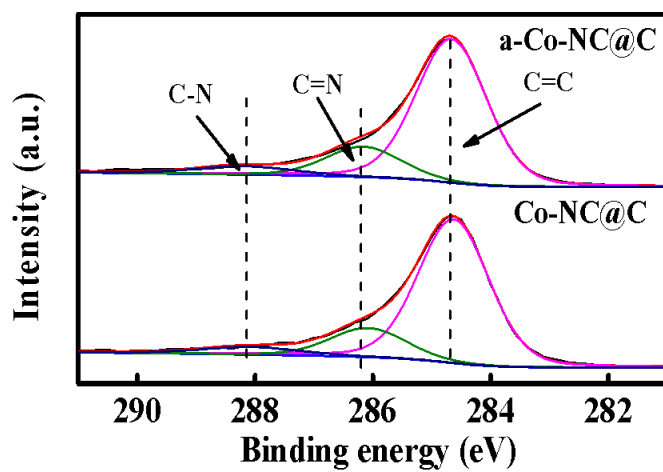

Fig.S3 High resolution XPS spectra of C 1s of Co-NC, Co-NC@C and a-Co-NC@C.

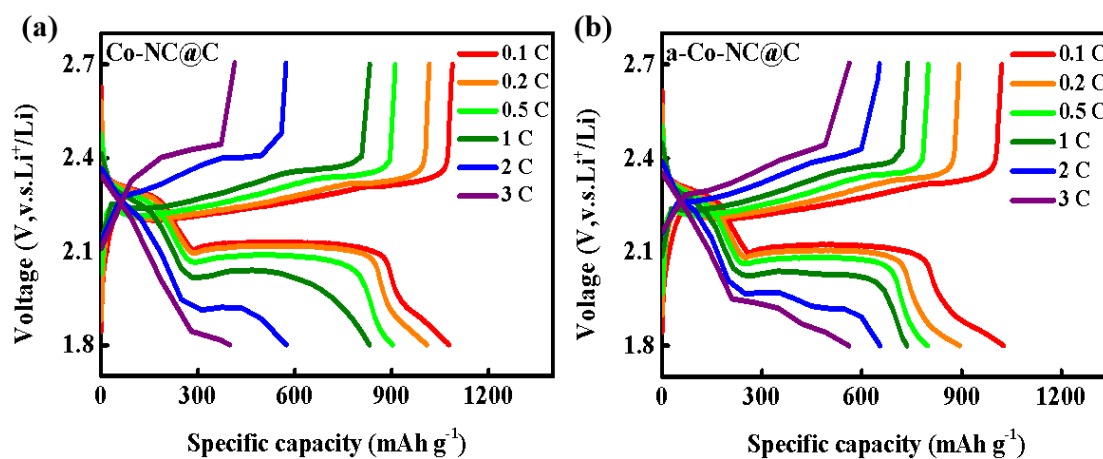

Fig.S4 Charge/discharge profiles at various rates of the cell with cathode of (a) Co-NC@C; (b) a-Co-NC@C.

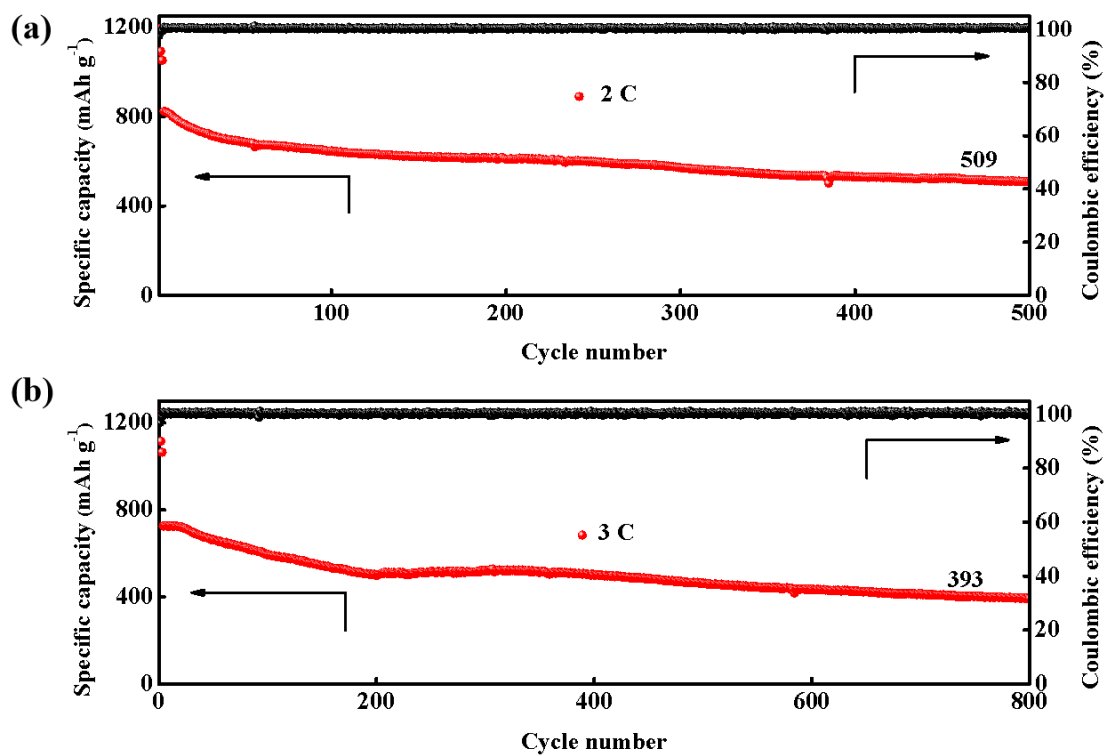

Fig.S5 Long term cycling performance at (a) 1 C; (b) 2 C of a-Co-NC@C/S electrode.

Table S1. Current density values at different redox peaks and polarization voltages of composite cathodes of Co-NC@C and a-Co-NC@C.

| Sample    | Current density |        |        |        | Polarization(mV)<br>for peak A&C |
|-----------|-----------------|--------|--------|--------|----------------------------------|
|           | Peak A          | Peak B | Peak C | Peak D |                                  |
| Co-NC@C   | −0.442          | −0.990 | 1.522  | 1.688  | 0.354                            |
| a-Co-NC@C | −0.620          | −2.062 | 2.097  | 1.625  | 0.270                            |
